# Supplementary material for: Mir155 regulates osteogenesis and bone mass phenotype via targeting S1pr1 gene
Source: eLife journal article supplement (doi:10.7554/elife.77742), 2023-01-04
Supplement: fig6-data1 [file Figure 6–Source Data.xlsx]

## Sheet: Sheet1
Figure 6 source data
Figure 6B			Figure 6D
OD value at 562 nm			ALP			RUNX2
WT	miR155-KI		WT	miR155-Tg		WT	miR155-Tg
1.501	0.279		0.429124	0.115679		0.811052	0.600296
1.37	0.304		0.431327	0.100298		0.933083	0.729144
1.705	0.303		0.199281	0.081714		1.0229	0.631961
1.42	0.294
Figure 6E			Figure 6H
OD value at 562 nm			ALP			RUNX2
WT	miR155-KO		WT	miR155-KO		WT	miR155-KO
0.826	2.011		0.423147	0.937034		1.29497	1.37088
0.742	1.486		0.672424	1.02265		1.0771	1.04757
0.658	1.624		0.680445	0.572773		1.10733	1.0741
0.61	1.736
