# Supplementary material for: Mir155 regulates osteogenesis and bone mass phenotype via targeting S1pr1 gene
Source: eLife journal article supplement (doi:10.7554/elife.77742), 2023-01-04
Supplement: fig8-data1 [file Figure 8–Source Data.xlsx]

## Sheet: Sheet1
Figure 8 source data
Figure 8C
Firefly luciferase
NC+S1PR1 3'UTR	miR-155+S1PR1 3'UTR	miR-155+S1PR1 mutant 3'UTR
370500	216000	277400
387300	267400	336100
265400	175000	445300
230300	234900	431000
Renilla luciferase
NC+S1PR1 3'UTR	miR-155+S1PR1 3'UTR	miR-155+S1PR1 mutant 3'UTR
3281.87	2831.7	3105.4
3857.16	3809.21	4028.31
2933.31	3395.17	3726.51
2702.92	3434.78	3803.97
Figure 8D
NC	miR-155 sponge
0.815891	0.997318
0.862709	0.930825
0.692215	0.929337
Figure 8F
OD value at 562 nm
LV242	LV242-S1PR1
1.088	2.193
0.891	2.41
0.962	1.947
Figure 8H
ALP			RUNX2			S1PR1
LV242	LV242-S1PR1		LV242	LV242-S1PR1		LV242	LV242-S1PR1
0.507307	1.18314		0.750083	1.40816		0.680075	1.07466
0.619251	1.10614		0.731643	1.02886		0.796566	1.10551
0.352458	0.542293		0.409458	1.07631		0.816432	1.21889
Figure 8I
1 DAY
NC	miR-155 sponge
0.711	0.755	OD at 570 nm
0.665	0.702	OD at 600 nm
0.787	0.757	OD at 570 nm
0.742	0.7	OD at 600 nm
0.769	0.752	OD at 570 nm
0.719	0.707	OD at 600 nm
0.766	0.743	OD at 570 nm
0.719	0.696	OD at 600 nm
3 DAY
NC	miR-155 sponge
0.712	0.831	OD at 570 nm
0.615	0.747	OD at 600 nm
0.759	0.763	OD at 570 nm
0.666	0.665	OD at 600 nm
0.736	0.745	OD at 570 nm
0.645	0.64	OD at 600 nm
0.735	1.037	OD at 570 nm
0.649	1.008	OD at 600 nm
5 DAY
NC	miR-155 sponge
0.756	0.815	OD at 570 nm
0.558	0.608	OD at 600 nm
0.768	0.804	OD at 570 nm
0.565	0.593	OD at 600 nm
0.782	0.784	OD at 570 nm
0.582	0.578	OD at 600 nm
0.85	0.762	OD at 570 nm
0.64	0.574	OD at 600 nm
