# Supplementary material for: Mir155 regulates osteogenesis and bone mass phenotype via targeting S1pr1 gene
Source: eLife. 2023 Jan 4;12:e77742. doi: 10.7554/eLife.77742 (PMC9839347; doi:10.7554/eLife.77742)
Supplement: Figure 1—source data 1. [file elife-77742-fig1-data1.xlsx]

## Sheet: Sheet1
Figure 1 source data
Figure. 1A						Figure. 1D
	Gene name	Cq	Gene name	Cq		BV/TV			BMD
WT-1	U6	16.27	miR155	24.06		WT	miR155-Tg		WT	miR155-Tg
WT-1	U6	16.24	miR155	24.46		87.9441	80.0596		1.08312	1.336
WT-1	U6	16.37	miR155	23.69		85.1174	71.7044		1.01289	0.9937
miR155-KI-1	U6	16.55	miR155	21.52		86.3552	79.7828		1.04888	1.38275
miR155-KI-1	U6	16.55	miR155	21.33		85.9902	88.1021		1.0601	1.1558
miR155-KI-1	U6	16.28	miR155	21.22		90.6502	87.7067		1.11079	1.03469
WT-2	U6	16.14	miR155	24.45		89.2346	88.4145		1.0921	1.08355
WT-2	U6	16.03	miR155	23.95		90.1346	85.1657		1.09032	1.07864
WT-2	U6	16.27	miR155	24.97		89.9757	85.5458		1.11617	1.46985
miR155-KI-2	U6	16.58	miR155	21.72
miR155-KI-2	U6	16.43	miR155	21.37
miR155-KI-2	U6	16.79	miR155	21.64
WT-3	U6	16.42	miR155	23.92
WT-3	U6	16.42	miR155	24.03
WT-3	U6	16	miR155	24.24
miR155-KI-3	U6	16.54	miR155	21.41
miR155-KI-3	U6	16.57	miR155	21.31
miR155-KI-3	U6	16.51	miR155	21.39
Figure. 1F
BV/TV			BMD			Tb.N
WT	miR155-Tg		WT	miR155-Tg		WT	miR155-Tg
12.5375	11.5815		0.7456	0.7075		0.00259	0.00255
10.9387	9.40837		0.6896	0.5869		0.00254	0.00223
13.234	9.59645		0.8043	0.6074		0.00282	0.00219
8.97758	8.03299		0.6126	0.5392		0.00207	0.00192
12.3093	6.8707		0.7464	0.4694		0.00262	0.0017
8.41362	5.55114		0.55	0.4114		0.00201	0.00149
17.4293	7.85101		0.9463	0.4911		0.00335	0.00191
12.6573	7.77845		0.7511	0.4972		0.00271	0.0018
Tb.Th			Tb.Sp
WT	miR155-Tg		WT	miR155-Tg
48.4328	45.4631		326.336	303.219
43.0856	42.1979		282.712	327.73
46.9914	43.821		283.471	303.908
43.3297	41.8954		322.417	305.078
46.9168	40.509		274.94	394.196
41.8122	37.2716		288.206	394.686
51.9812	41.1999		214.714	294.511
46.6298	43.1864		241.203	388.71
