# Supplementary material for: Mir155 regulates osteogenesis and bone mass phenotype via targeting S1pr1 gene
Source: eLife. 2023 Jan 4;12:e77742. doi: 10.7554/eLife.77742 (PMC9839347; doi:10.7554/eLife.77742)
Supplement: Figure 3—source data 1. [file elife-77742-fig3-data1.xlsx]

## Sheet: Sheet1
Figure 3 source data
Figure 3C
BV/TV			BMD
WT+LPS	miR155-KO+LPS		WT+LPS	miR155-KO+LPS
58.049	71.0814		1.06619	1.31748
63.8073	73.248		1.15407	1.26764
60.6233	71.8278		1.1219	1.31581
60.539	73.5253		1.09471	1.35763
67.4823	64.1823		1.18416	1.21025
66.1802	69.23		1.21106	1.33553
Figure 3E
BV/TV			BMD			Tb.N
WT+LPS	miR155-KO+LPS		WT+LPS	miR155-KO+LPS		WT+LPS	miR155-KO+LPS
5.11572	11.8038		0.230365	0.30267		0.94487	1.96259
3.26614	11.2066		0.203685	0.291505		0.61224	1.83475
4.2401	7.35639		0.21849	0.249195		0.7163	1.50321
2.83149	8.2381		0.199515	0.26623		0.25742	1.43578
2.03663	2.76118		0.19531	0.19394		0.37168	0.537195
2.54487	4.80907		0.2025	0.22481		0.20569	1.05367
Tb.Th			Tb.Sp
WT+LPS	miR155-KO		WT+LPS	miR155-KO+LPS
0.05431	0.06013		0.45673	0.35949
0.05344	0.060925		0.537325	0.283385
0.059585	0.048895		0.40814	0.258995
0.39324	0.05726		0.5172	0.319885
0.054955	0.0514		0.570815	0.537165
0.31885	0.045645		0.64393	0.34267
