# Supplementary material for: Mir155 regulates osteogenesis and bone mass phenotype via targeting S1pr1 gene
Source: eLife. 2023 Jan 4;12:e77742. doi: 10.7554/eLife.77742 (PMC9839347; doi:10.7554/eLife.77742)
Supplement: Figure 4—source data 1. [file elife-77742-fig4-data1.xlsx]

## Sheet: Sheet1
Figure 4 source data
Figure 4B-E
Fig. 4B (BV/TV)			Fig. 4C (Tb.N)			Fig. 4D (Tb.Th)			Fig. 4E (Tb.Sp)
Control	miR155-Tg		Control	miR155-Tg		Control	miR155-Tg		Control	miR155-Tg
0.27016	0.00763		0.07214	0.00078		0.03745	0.09812		0.84482	1.53164
0.16699	0		0.05267	0		0.03171	0		1.24271	1.05759
0.20924	0.0404		0.05249	0.01072		0.03986	0.0377		1.16905	1.42727
0.22	0.02566		0.055	0.03792		0.03368	0.03792		0.90955	1.28701
Figure 4G-J
Fig. 4G (BV/TV)			Fig. 4H (Tb.N)			Fig. 4I (Tb.Th)			Fig. 4J (Tb.Sp)
Control	miR-155 KO		Control	miR-155 KO		Control	miR-155 KO		Control	miR-155 KO
1.0016	3.75353		0.20071	0.67573		0.0499	0.05555		1109.01	812.7
0.1884	3.03481		0.04194	0.56478		0.04492	0.05373		1112.61	824.54
0.53118	2.99074		0.12947	0.64236		0.04103	0.04656		910.58	920.55
0.72046	5.15924		0.17124	1.1816		0.04207	0.04366		1148.36	596.87
