# Supplementary material for: Mir155 regulates osteogenesis and bone mass phenotype via targeting S1pr1 gene
Source: eLife. 2023 Jan 4;12:e77742. doi: 10.7554/eLife.77742 (PMC9839347; doi:10.7554/eLife.77742)
Supplement: Figure 5—source data 1. [file elife-77742-fig5-data1.xlsx]

## Sheet: Sheet1
Figure 5 source data
Figure 5C-G
Fig. 5C (BV/TV)			Fig. 5D (BMD）			Fig. 5E (Tb.N)			Fig. 5F (Tb.Th)			Fig. 5G (Tb.Sp)
WT	miR155-Tg		WT	miR155-Tg		WT	miR155-Tg		WT	miR155-Tg		WT	miR155-Tg
7.29682	16.2891		0.07011	0.34668		0.63947	2.28185		0.11411	0.07139		0.51295	0.33559
14.5825	15.9327		0.2417	0.33544		1.56013	2.3918		0.09347	0.06661		0.37902	0.31506
10.4949	21.039		0.29157	0.40418		1.56871	2.9026		0.0669	0.07248		0.34878	0.2523
6.73156	28.8551		0.17757	0.47754		0.55053	3.64978		0.12227	0.07906		0.43699	0.19901
28.6865	19.8191		0.48547	0.38556		3.74147	2.94714		0.07667	0.06725		0.24461	0.30056
16.4084	26.1605		0.35434	0.47833		2.28325	3.37765		0.07186	0.07745		0.34267	0.2291
13.5626	16.87		0.22687	0.37786		1.59185	2.62201		0.0852	0.06434		0.50693	0.32487
6.29926	24.3658		0.09851	0.42352		0.54965	3.10137		0.11461	0.07856		0.54002	0.2398
