# Supplementary material for: Mir155 regulates osteogenesis and bone mass phenotype via targeting S1pr1 gene
Source: eLife journal article supplement (doi:10.7554/elife.77742), 2023-01-04
Supplement: supp [file elife-77742-supp-v1.zip]

**Figure 6C**


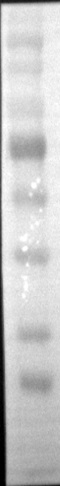

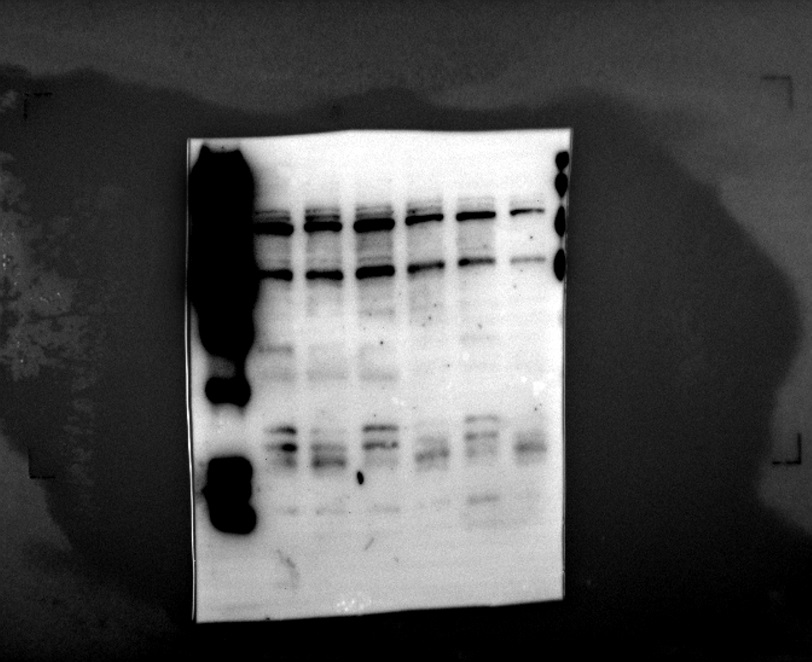

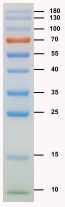


**35 kDa**

**40 kDa**

**ALP**

**1, WT-1**

**2, miR155-KI-1**

**3, WT-2**

**4, miR155-KI-2**

**5, WT-3**

**6, miR155-KI-3**

**Loading 1 2 3 4 5 6**

**
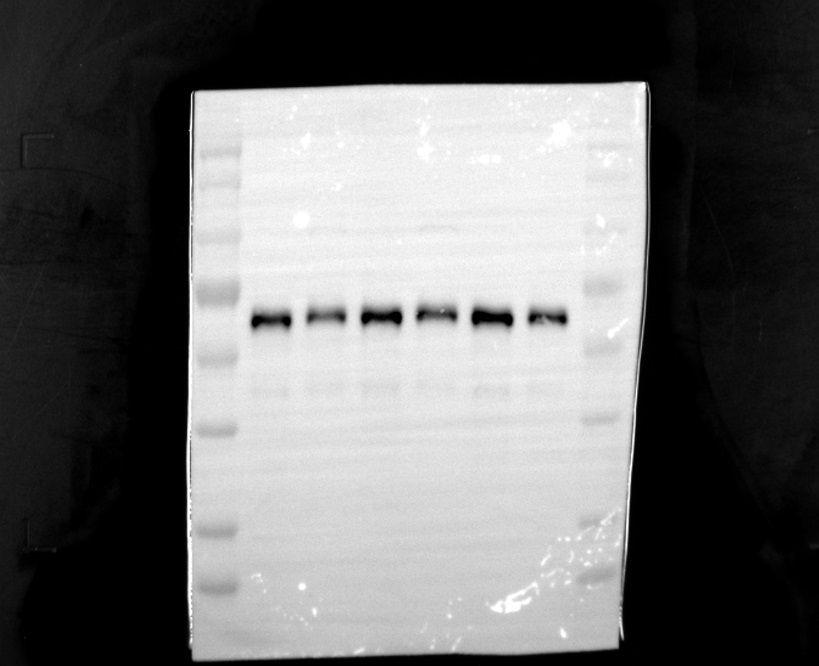

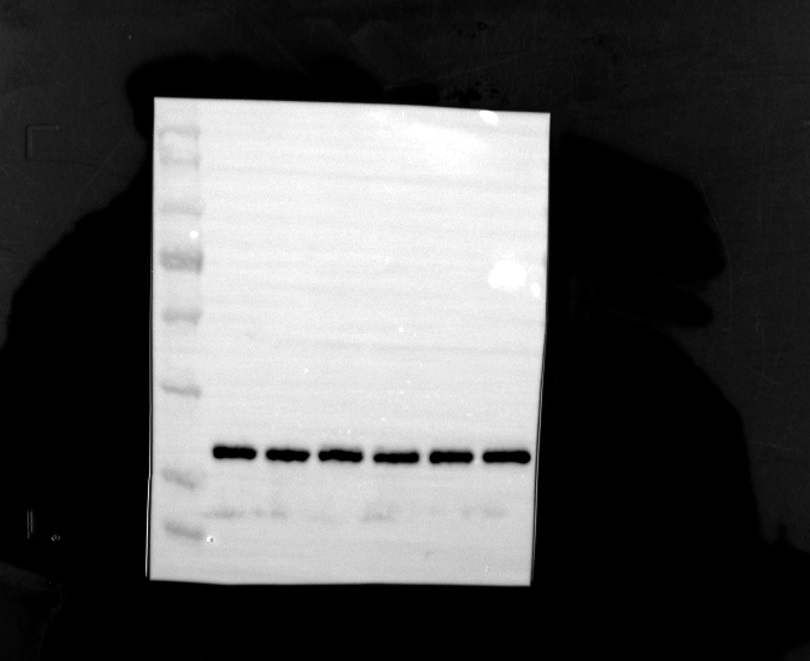
**

**40 kDa**

**35 kDa**

**55 kDa**

**70 kDa**

**Loading 1 2 3 4 5 6**

**RUNX2**

**GAPDH**

**1, WT-1**

**2, miR155-KI-1**

**3, WT-2**

**4, miR155-KI-2**

**5, WT-3**

**6, miR155-KI-3**

**1, WT-1**

**2, miR155-KI-1**

**3, WT-2**

**4, miR155-KI-2**

**5, WT-3**

**6, miR155-KI-3**

**Loading 1 2 3 4 5 6**

**Figure 6G**


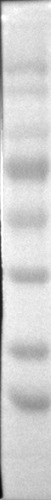
**
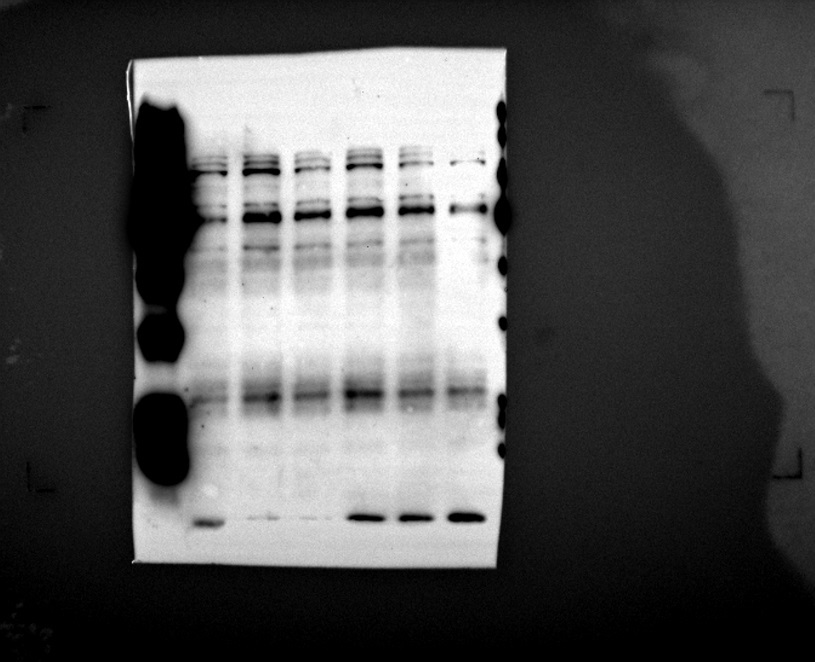
**

**ALP**

**1, WT-1**

**2, miR155-KO-1**

**3, WT-2**

**4, miR155-KO-2**

**5, WT-3**

**6, miR155-KO-3**

**35 kDa**

**40 kDa**

**Loading 1 2 3 4 5 6**


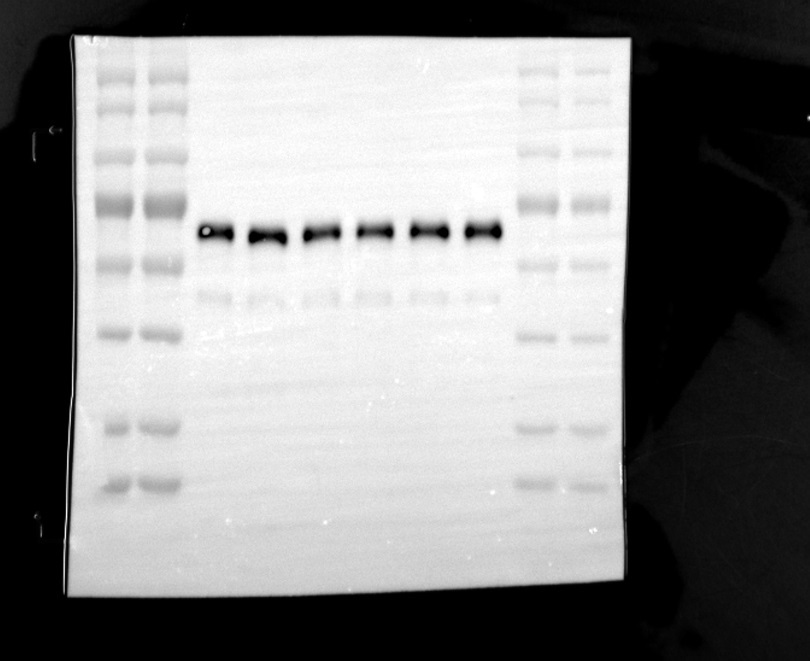

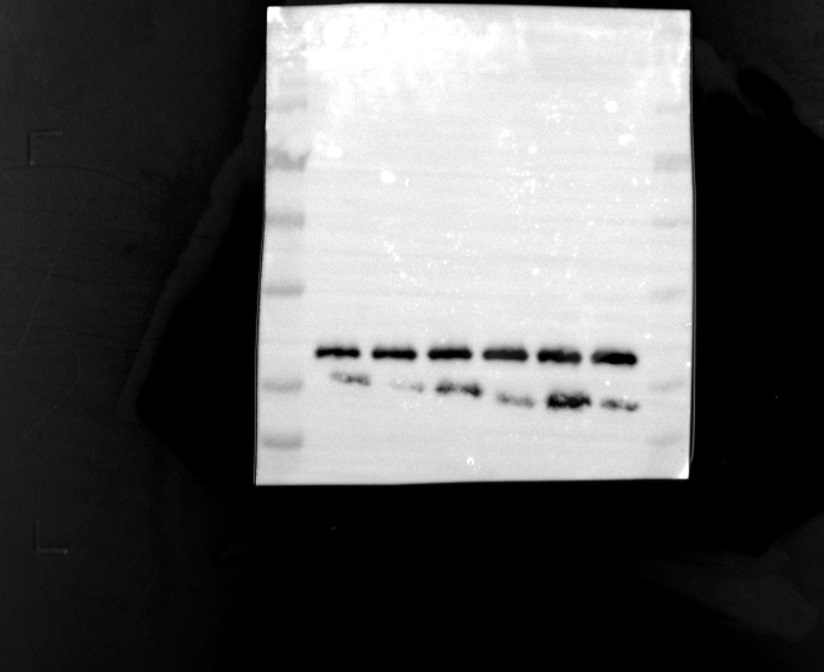


**RUNX2**

**GAPDH**

**1, WT-1**

**2, miR155-KO-1**

**3, WT-2**

**4, miR155-KO-2**

**5, WT-3**

**6, miR155-KO-3**

**1, WT-1**

**2, miR155-KO-1**

**3, WT-2**

**4, miR155-KO-2**

**5, WT-3**

**6, miR155-KO-3**

**Loading 1 2 3 4 5 6**

**55 kDa**

**70 kDa**

**35 kDa**

**40 kDa**

**Loading 1 2 3 4 5 6**
