# Supplementary material for: Mir155 regulates osteogenesis and bone mass phenotype via targeting S1pr1 gene
Source: eLife journal article supplement (doi:10.7554/elife.77742), 2023-01-04
Supplement: supp [file Figure 2–Source Data 2.xlsx]

## Sheet: Sheet1
Figure. 2A								Figure. 2D
miR155 expression
		Gene name	Cq	Gene name	Cq				BV/TV			BMD
	WT-1	U6	15.42	miR155	21.86				WT	miR-155KO		WT	miR-155KO
	WT-1	U6	15.69	miR155	21.56				79.9905	93.9487		1.52523	1.53636
	WT-1	U6	15.38	miR155	21.77				88.0979	91.7915		1.54045	1.34738
	miR155-KO-1	U6	16.59	miR155	19				79.0003	92.9292		1.50497	1.52978
	miR155-KO-1	U6	16.58	miR155	19.86				77.6571	93.3097		1.47704	1.53835
	miR155-KO-1	U6	16.75	miR155	19.9				84.6802	92.8572		1.62219	1.79476
	WT-2	U6	15.43	miR155	22.14				85.4719	93.4002		1.63922	1.80536
	WT-2	U6	15.66	miR155	22				83.38	89.3115		1.5956	1.71982
	WT-2	U6	15.74	miR155	22				92.6385	93.8368		1.47087	1.81453
	miR155-KO-2	U6	16.58	miR155	20.19
	miR155-KO-2	U6	16.82	miR155	19.94
	miR155-KO-2	U6	17.03	miR155	20.25
	WT-3	U6	15.73	miR155	20.35
	WT-3	U6	15.63	miR155	20.43
	WT-3	U6	15.2	miR155	19.21
	miR155-KO-3	U6	16.62	miR155	20.18
	miR155-KO-3	U6	16.72	miR155	19.89
	miR155-KO-3	U6	16.62	miR155	19.86
Figure. 2F
BV/TV			BMD			Tb.N
WT	miR-155KO		WT	miR-155KO		WT	miR-155KO
12.9794	18.8783		0.13608	0.20976		3.26003	4.56258
11.5339	14.8823		0.12049	0.16341		3.28332	3.93322
14.1945	24.9828		0.12127	0.24945		3.51805	6.24204
13.5	25.4386		0.135	0.26153		2.64986	6.28435
8.90142	15.0452		0.1986	0.43037		2.08042	3.76681
8.89624	16.1923		0.19562	0.45757		2.15577	3.94737
7.11491	27.772		0.13112	0.73464		1.82809	4.38557
6.91229	25.2299		0.14275	0.67086		1.85141	4.5701
Tb.Th			Tb.Sp
WT	miR-155KO		WT	miR-155KO
0.04	0.04138		196.48	180.95
0.035	0.03784		188.27	214.29
0.04035	0.04002		182.79	125.71
0.046	0.04048		175.5	123.68
0.04279	0.03994		332.24	154.06
0.04127	0.041		277.23	154.53
0.03892	0.06333		333.03	152.14
0.03734	0.05521		323.26	154.81
