# Supplementary material for: Mir155 regulates osteogenesis and bone mass phenotype via targeting S1pr1 gene
Source: eLife journal article supplement (doi:10.7554/elife.77742), 2023-01-04
Supplement: supp [file Figure 3–Source Data 3.xlsx]

## Sheet: Sheet1
Figure 3C
	BV/TV				BMD
		WT+LPS	miR155-KO+LPS			WT+LPS	miR155-KO+LPS
		58.049	71.0814			1.06619	1.31748
		63.8073	73.248			1.15407	1.26764
		60.6233	71.8278			1.1219	1.31581
		60.539	73.5253			1.09471	1.35763
		67.4823	64.1823			1.18416	1.21025
		66.1802	69.23			1.21106	1.33553
Figure 3E		BV/TV				BMD			Tb.N
			WT+LPS	miR155-KO+LPS		WT+LPS	miR155-KO+LPS			WT+LPS	miR155-KO+LPS
			5.11572	11.8038		0.230365	0.30267			0.94487	1.96259
			3.26614	11.2066		0.203685	0.291505			0.61224	1.83475
			4.2401	7.35639		0.21849	0.249195			0.7163	1.50321
			2.83149	8.2381		0.199515	0.26623			0.25742	1.43578
			2.03663	2.76118		0.19531	0.19394			0.37168	0.537195
			2.54487	4.80907		0.2025	0.22481			0.20569	1.05367
		Tb.Th				Tb.Sp
			WT+LPS	miR155-KO			WT+LPS	miR155-KO+LPS
			0.05431	0.06013			0.45673	0.35949
			0.05344	0.060925			0.537325	0.283385
			0.059585	0.048895			0.40814	0.258995
			0.39324	0.05726			0.5172	0.319885
			0.054955	0.0514			0.570815	0.537165
			0.31885	0.045645			0.64393	0.34267
