# Supplementary material for: Mir155 regulates osteogenesis and bone mass phenotype via targeting S1pr1 gene
Source: eLife journal article supplement (doi:10.7554/elife.77742), 2023-01-04
Supplement: supp [file Figure 4–Source Data 4.xlsx]

## Sheet: Sheet1
Figure 3B-E
BV/TV				Tb.N					Tb.Th				Tb.Sp
Control	miR155-Tg			Control	miR155-Tg				Control	miR155-Tg			Control	miR155-Tg
0.27016	0.00763			0.07214	0.00078				0.03745	0.09812			0.84482	1.53164
0.16699	0			0.05267	0				0.03171	0			1.24271	1.05759
0.20924	0.0404			0.05249	0.01072				0.03986	0.0377			1.16905	1.42727
0.22	0.02566			0.055	0.03792				0.03368	0.03792			0.90955	1.28701
Figure 3F-J
BV/TV				Tb.N					Tb.Th				Tb.Sp
Control	miR-155 KO			Control	miR-155 KO				Control	miR-155 KO			Control	miR-155 KO
1.0016	3.75353			0.20071	0.67573				0.0499	0.05555			1109.01	812.7
0.1884	3.03481			0.04194	0.56478				0.04492	0.05373			1112.61	824.54
0.53118	2.99074			0.12947	0.64236				0.04103	0.04656			910.58	920.55
0.72046	5.15924			0.17124	1.1816				0.04207	0.04366			1148.36	596.87
