# Supplementary material for: Mir155 regulates osteogenesis and bone mass phenotype via targeting S1pr1 gene
Source: eLife journal article supplement (doi:10.7554/elife.77742), 2023-01-04
Supplement: supp [file Figure 5–Source Data 5.xlsx]

## Sheet: Sheet1
Figure 5C-G
BV/TV				BMD				Tb.N					Tb.Th				Tb.Sp
WT	miR155-Tg			WT	miR155-Tg			WT	miR155-Tg				WT	miR155-Tg			WT	miR155-Tg
7.29682	16.2891			0.07011	0.34668			0.63947	2.28185				0.11411	0.07139			0.51295	0.33559
14.5825	15.9327			0.2417	0.33544			1.56013	2.3918				0.09347	0.06661			0.37902	0.31506
10.4949	21.039			0.29157	0.40418			1.56871	2.9026				0.0669	0.07248			0.34878	0.2523
6.73156	28.8551			0.17757	0.47754			0.55053	3.64978				0.12227	0.07906			0.43699	0.19901
28.6865	19.8191			0.48547	0.38556			3.74147	2.94714				0.07667	0.06725			0.24461	0.30056
16.4084	26.1605			0.35434	0.47833			2.28325	3.37765				0.07186	0.07745			0.34267	0.2291
13.5626	16.87			0.22687	0.37786			1.59185	2.62201				0.0852	0.06434			0.50693	0.32487
6.29926	24.3658			0.09851	0.42352			0.54965	3.10137				0.11461	0.07856			0.54002	0.2398
