# Supplementary material for: Mir155 regulates osteogenesis and bone mass phenotype via targeting S1pr1 gene
Source: eLife journal article supplement (doi:10.7554/elife.77742), 2023-01-04
Supplement: supp [file Figure 6–Source Data 6.xlsx]

## Sheet: Sheet1
Figure 6B				Figure 6D
WT	miR155-KI	OD value at 562 nm			ALP				RUNX2
1.501	0.279					WT	miR155-Tg			WT	miR155-Tg
1.37	0.304					0.429124	0.115679			0.811052	0.600296
1.705	0.303					0.431327	0.100298			0.933083	0.729144
1.42	0.294					0.199281	0.081714			1.0229	0.631961
Figure 6E				Figure 6H
WT	miR155-KO	OD value at 562 nm			ALP				RUNX2
0.826	2.011					WT	miR155-KO			WT	miR155-KO
0.742	1.486					0.423147	0.937034			1.29497	1.37088
0.658	1.624					0.672424	1.02265			1.0771	1.04757
0.61	1.736					0.680445	0.572773			1.10733	1.0741
