# Supplementary material for: Mir155 regulates osteogenesis and bone mass phenotype via targeting S1pr1 gene
Source: eLife journal article supplement (doi:10.7554/elife.77742), 2023-01-04
Supplement: supp [file Figure 7–Source Data 7.xlsx]

## Sheet: Sheet1
Figure 7A
		Cq value
NC	U6	11.55
NC	U6	12.1
NC	U6	12.1
NC	miR-155	19.16
NC	miR-155	19.23
NC	miR-155	19.18
miR-155 sponge	U6	11.47
miR-156 sponge	U6	10.27
miR-157 sponge	U6	11.37
miR-158 sponge	miR-155	19.88
miR-159 sponge	miR-155	19.88
miR-160 sponge	miR-155	19.63
Figure 7C
NC	miR-155 sponge	OD at 562 nm
0.479	1.452
0.423	1.525
0.483	1.629
Figure 7E
	ALP				RUNX2
		NC	miR155 sponge			NC	miR-155 sponge
		0.4126	0.654743			0.407282	1.02264
		0.395594	0.471809			0.556848	0.923298
		0.272855	0.655826			0.663428	1.01861
Figure 7F
	1 DAY	NC	miR-155 sponge
		0.558	0.566	OD at 570 nm
		0.485	0.481	OD at 600 nm
		0.555	0.557	OD at 570 nm
		0.48	0.472	OD at 600 nm
		0.55	0.548	OD at 570 nm
		0.478	0.479	OD at 600 nm
		0.548	0.569	OD at 570 nm
		0.47	0.473	OD at 600 nm
	3 DAY	NC	miR-155 sponge
		0.676	0.711	OD at 570 nm
		0.356	0.382	OD at 600 nm
		0.714	0.73	OD at 570 nm
		0.422	0.39	OD at 600 nm
		0.724	0.75	OD at 570 nm
		0.417	0.378	OD at 600 nm
		0.725	0.689	OD at 570 nm
		0.425	0.341	OD at 600 nm
	5 DAY	NC	miR-155 sponge
		0.699	0.667	OD at 570 nm
		0.383	0.36	OD at 600 nm
		0.663	0.69	OD at 570 nm
		0.369	0.381	OD at 600 nm
		0.679	0.649	OD at 570 nm
		0.368	0.359	OD at 600 nm
		0.669	0.662	OD at 570 nm
		0.369	0.355	OD at 600 nm
