# Supplementary material for: Mir155 regulates osteogenesis and bone mass phenotype via targeting S1pr1 gene
Source: eLife journal article supplement (doi:10.7554/elife.77742), 2023-01-04
Supplement: supp [file Figure 9–Source Data 9.xlsx]

## Sheet: Sheet1
Figure 9B
	WT	miR155-KO
	21.6667	11.6667
	26.6667	16
	31.3333	13.3333
	26.6667	10.3333
	23.3333	12.3333
	21.6667	14.6667
	18	15.3333
	15.6667	12.6667
Figure 9C
Samples	Gene	Cq	Gene	Cq	Gene	Cq
WT-1	GAPDH	14.4	Rank	21.74	Ctsk	19.75
WT-1	GAPDH	14.24	Rank	21.46	Ctsk	19.64
WT-1	GAPDH	14.25	Rank	21.66	Ctsk	19.57
miR155-KO-1	GAPDH	14.34	Rank	22.61	Ctsk	22.12
miR155-KO-1	GAPDH	14.28	Rank	22.66	Ctsk	21.43
miR155-KO-1	GAPDH	14.3	Rank	22.95	Ctsk	21.93
WT-2	GAPDH	14.37	Rank	21.03	Ctsk	19.49
WT-2	GAPDH	14.3	Rank	21.03	Ctsk	19.51
WT-2	GAPDH	14.3	Rank	21.04	Ctsk	19.43
miR155-KO-2	GAPDH	14.56	Rank	22.34	Ctsk	21.66
miR155-KO-2	GAPDH	14.57	Rank	22.13	Ctsk	21.62
miR155-KO-2	GAPDH	14.71	Rank	22.44	Ctsk	21.88
WT-3	GAPDH	14.45	Rank	21.62	Ctsk	19.99
WT-3	GAPDH	14.37	Rank	21.53	Ctsk	19.95
WT-3	GAPDH	14.39	Rank	21.55	Ctsk	19.85
miR155-KO-3	GAPDH	14.54	Rank	22.35	Ctsk	21.21
miR155-KO-3	GAPDH	14.4	Rank	22.34	Ctsk	21.29
miR155-KO-3	GAPDH	14.61	Rank	22.2	Ctsk	21.26
Figure 9D
	CTX-2			PINP
	WT	miR155-KO			WT	miR155-KO
	2.6526	3.28777			0.629308	1.71023
	4.34244	1.82097	(ng/mL)		0.897122	1.79591	(ng/mL)
	3.62637	3.13073			0.649758	2.153
	6.84616	1.48751			1.12019	3.3794
	4.67965	1.97522			1.43643	4.0527
	6.4193	2.62113			1.40767	3.18485
