# Supplementary material for: Mir155 regulates osteogenesis and bone mass phenotype via targeting S1pr1 gene
Source: eLife journal article supplement (doi:10.7554/elife.77742), 2023-01-04
Supplement: supp [file WB blot.docx]

**Figure 7D**


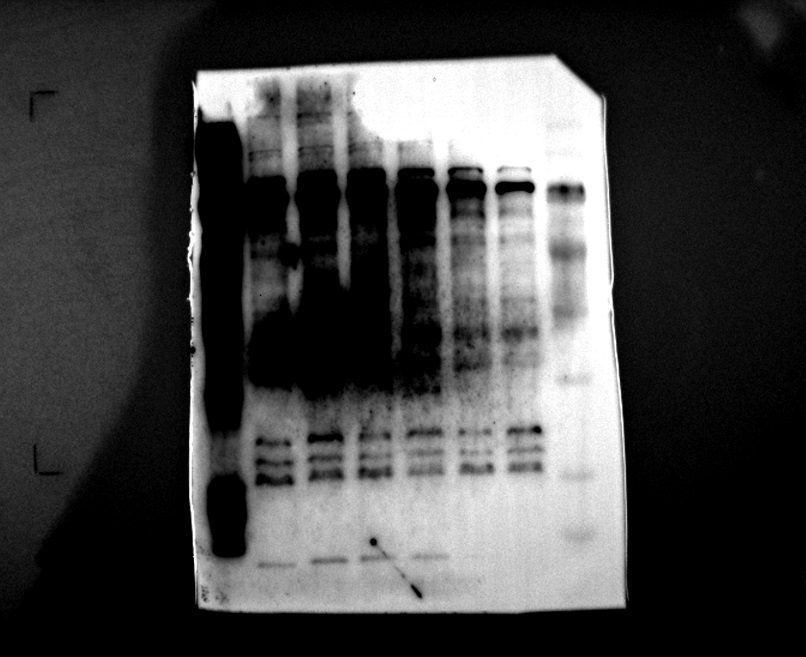

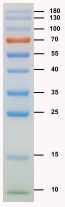


**1, NC-1**

**2, miR155 sponge-1**

**3, NC-2**

**4, miR155 sponge-2**

**5, NC-3**

**6, miR155-sponge-3**

**35 kDa**

**40 kDa**

**Loading 1 2 3 4 5 6**


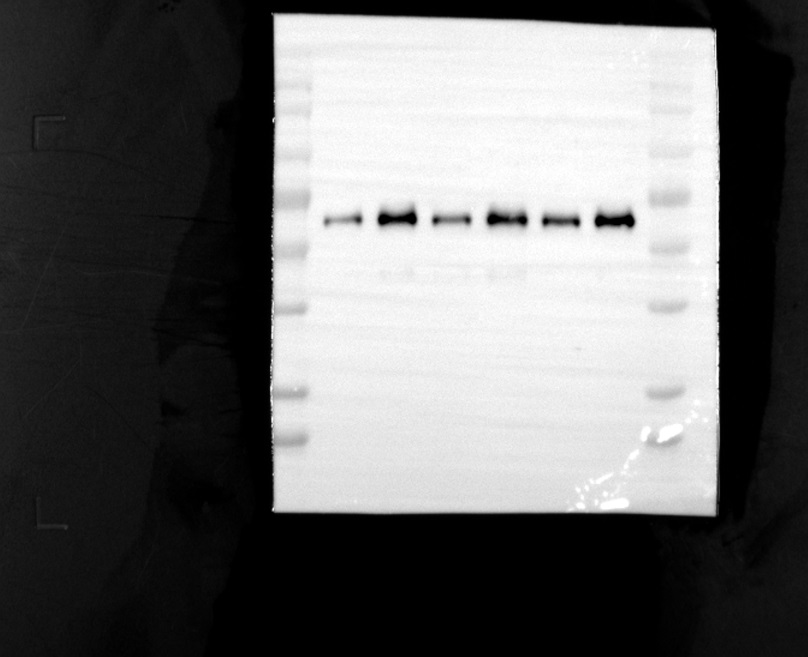

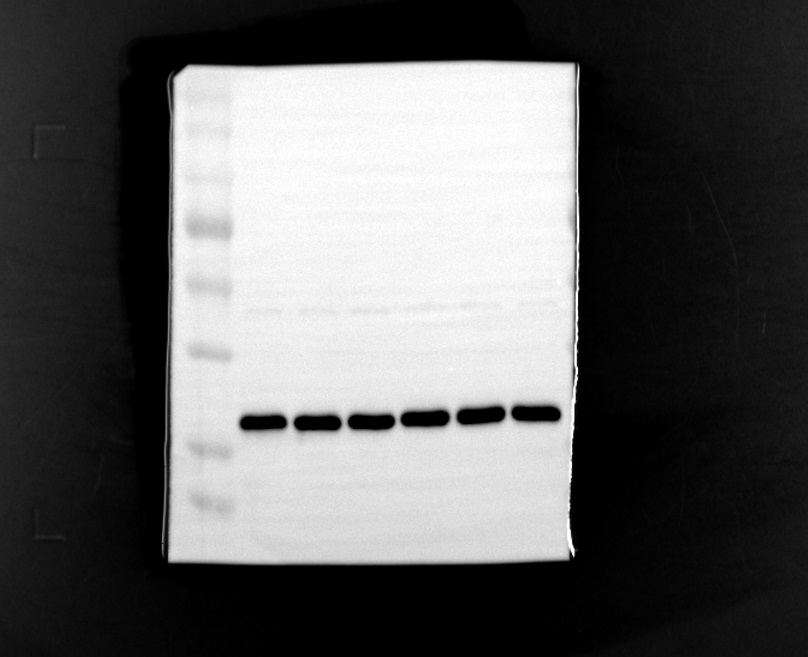


**GAPDH**

**1, NC-1**

**2, miR155 sponge-1**

**3, NC-2**

**4, miR155 sponge-2**

**5, NC-3**

**6, miR155-sponge-3**

**1, NC-1**

**2, miR155 sponge-1**

**3, NC-2**

**4, miR155 sponge-2**

**5, NC-3**

**6, miR155-sponge-3**

**55 kDa**

**70 kDa**

**RUNX2**

**35 kDa**

**40 kDa**

**Loading 1 2 3 4 5 6**

**Loading 1 2 3 4 5 6**
