# Supplementary figures and images for: Mir155 regulates osteogenesis and bone mass phenotype via targeting S1pr1 gene
Source: eLife journal article supplement (doi:10.7554/elife.77742), 2023-01-04

Figure 6C

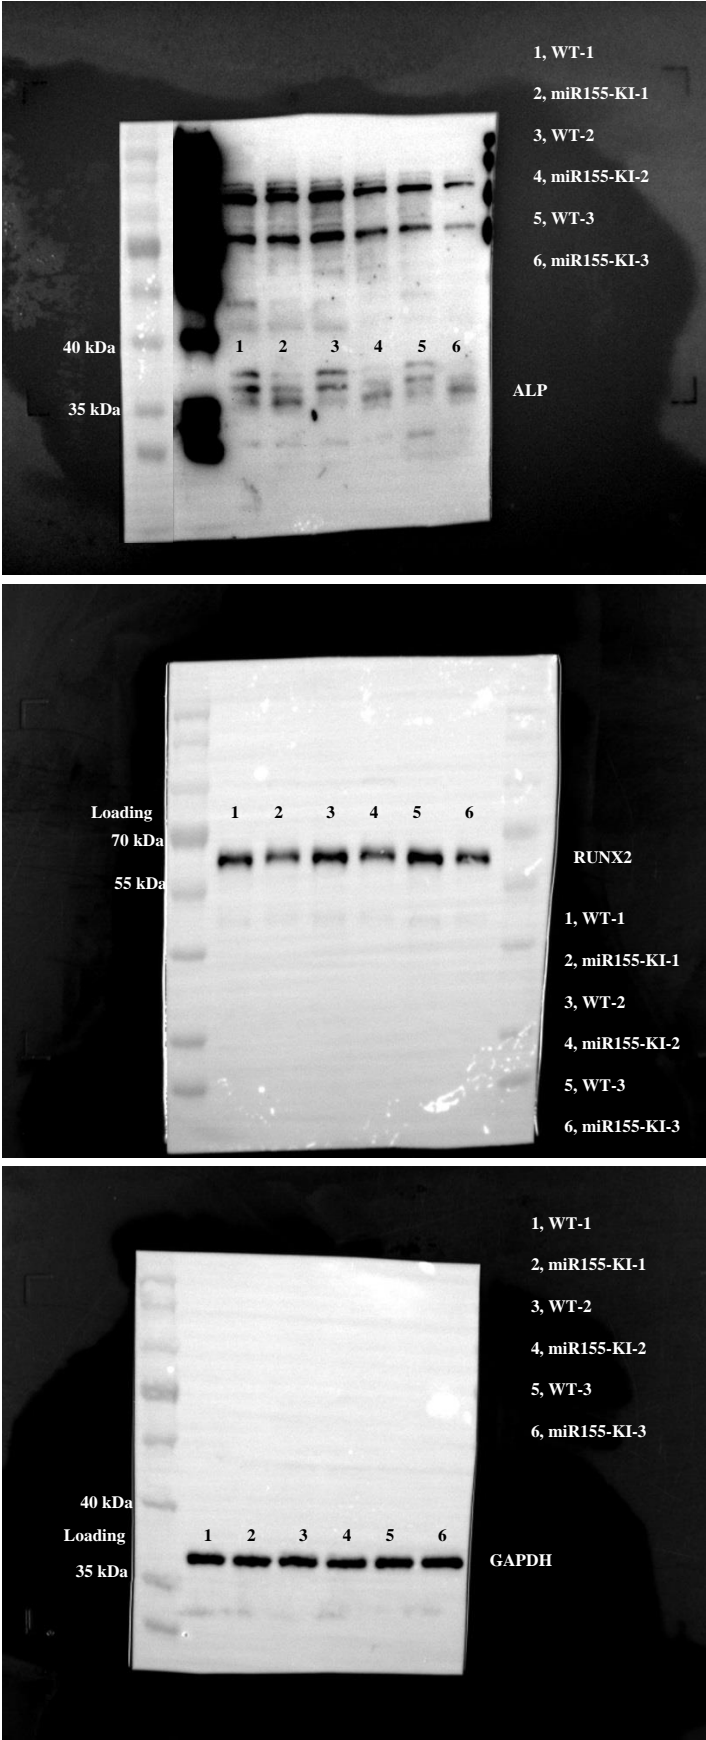

Figure 6G

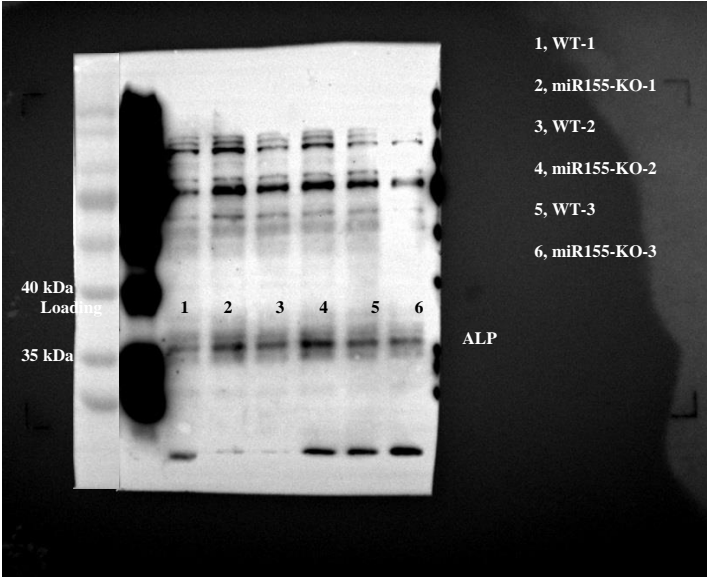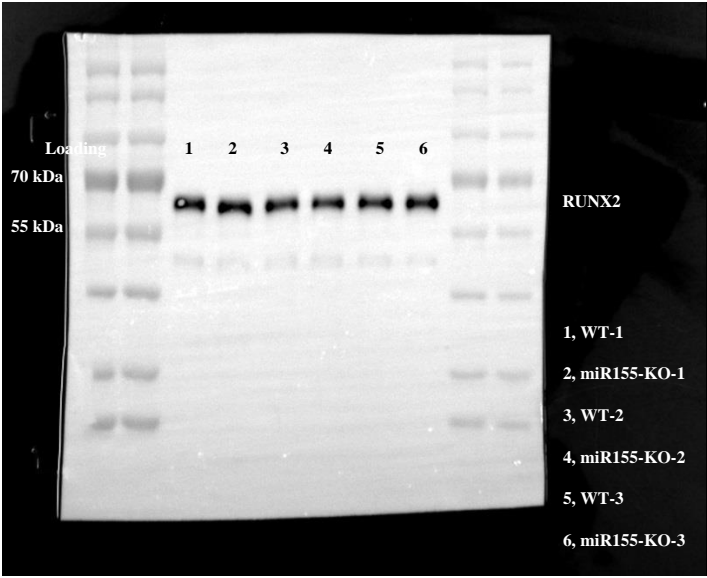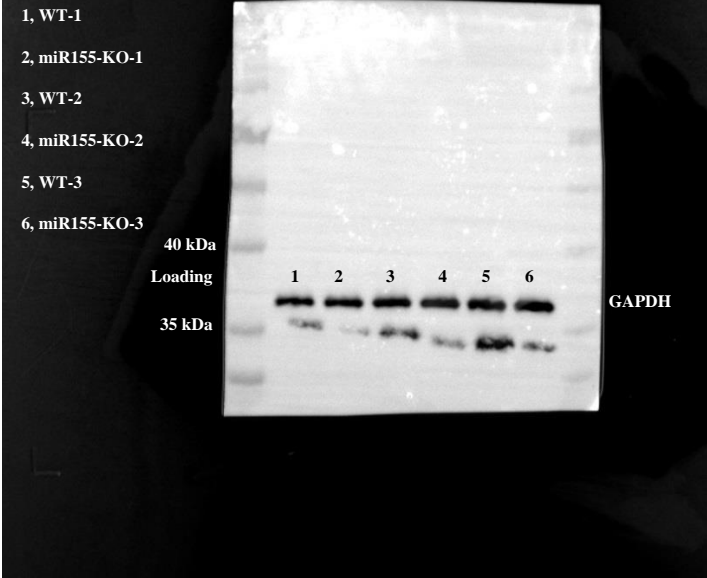

Supplement: fig6-data1 [file elife-77742-fig6-data1-v2.zip]

Figure 7D

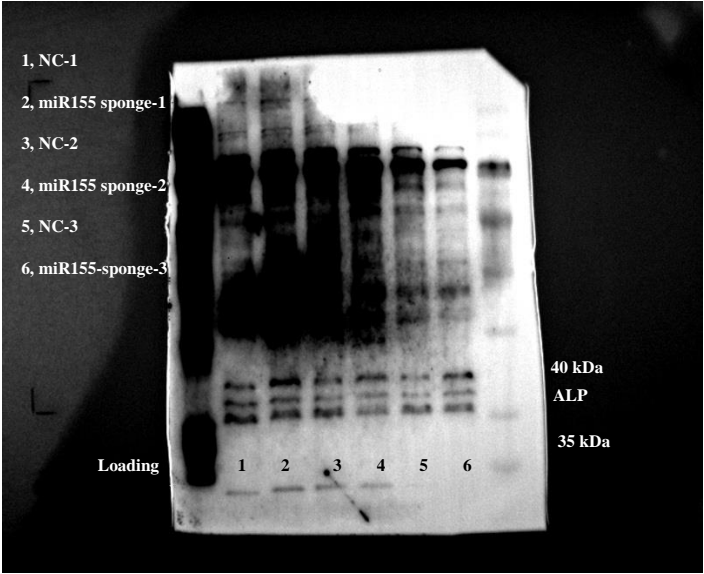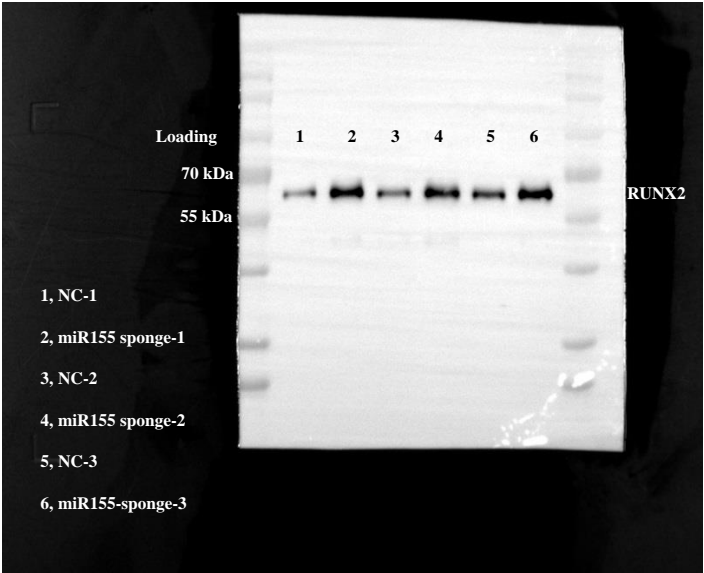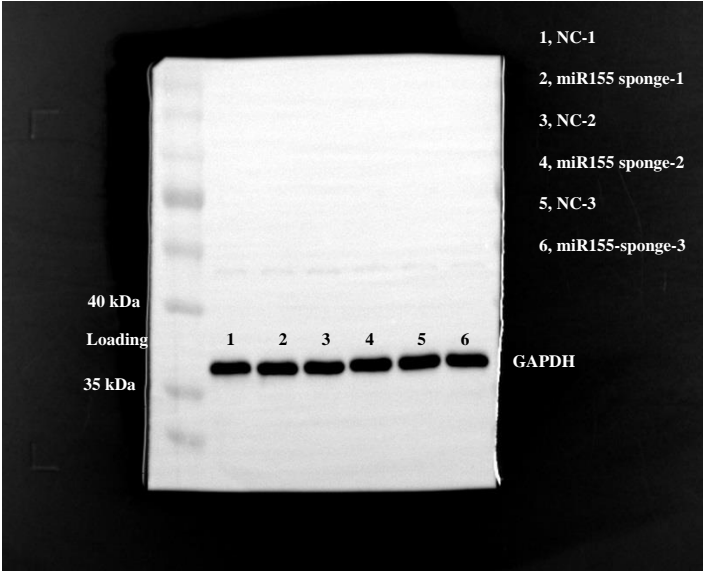

Supplement: fig7-data1 [file elife-77742-fig7-data1-v2.zip]

Figure 8D

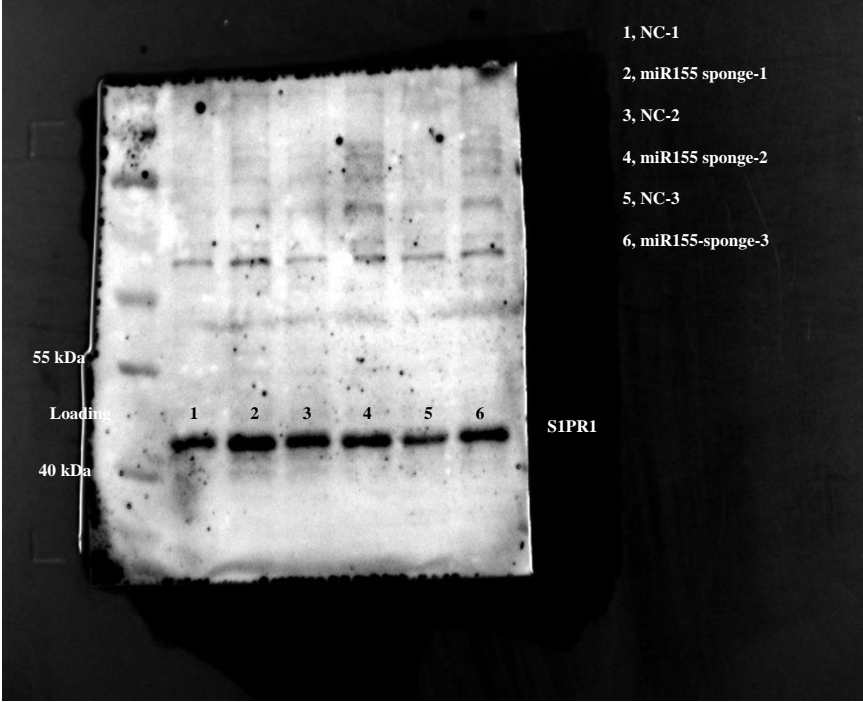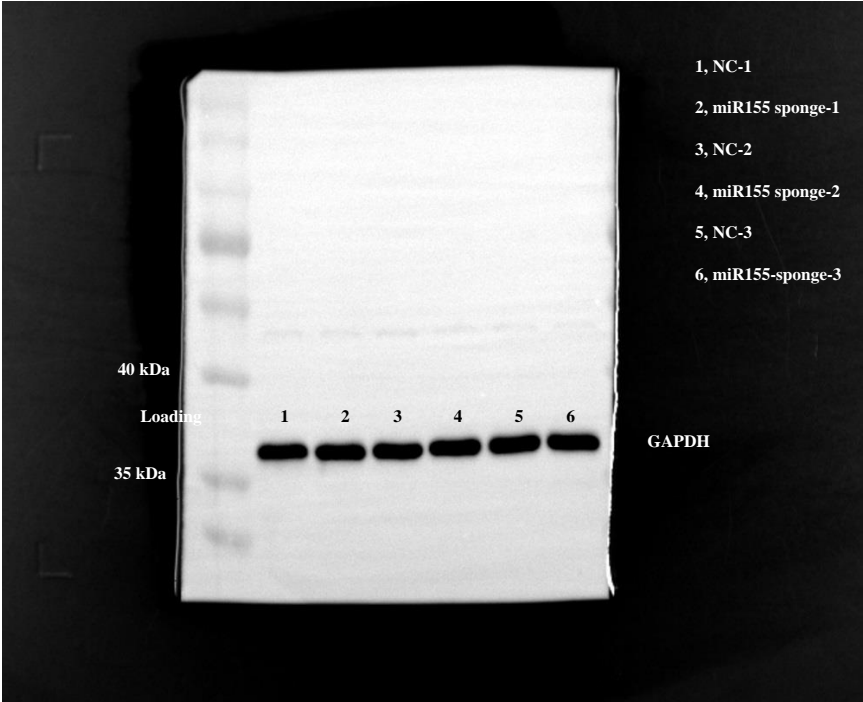

Figure 8G

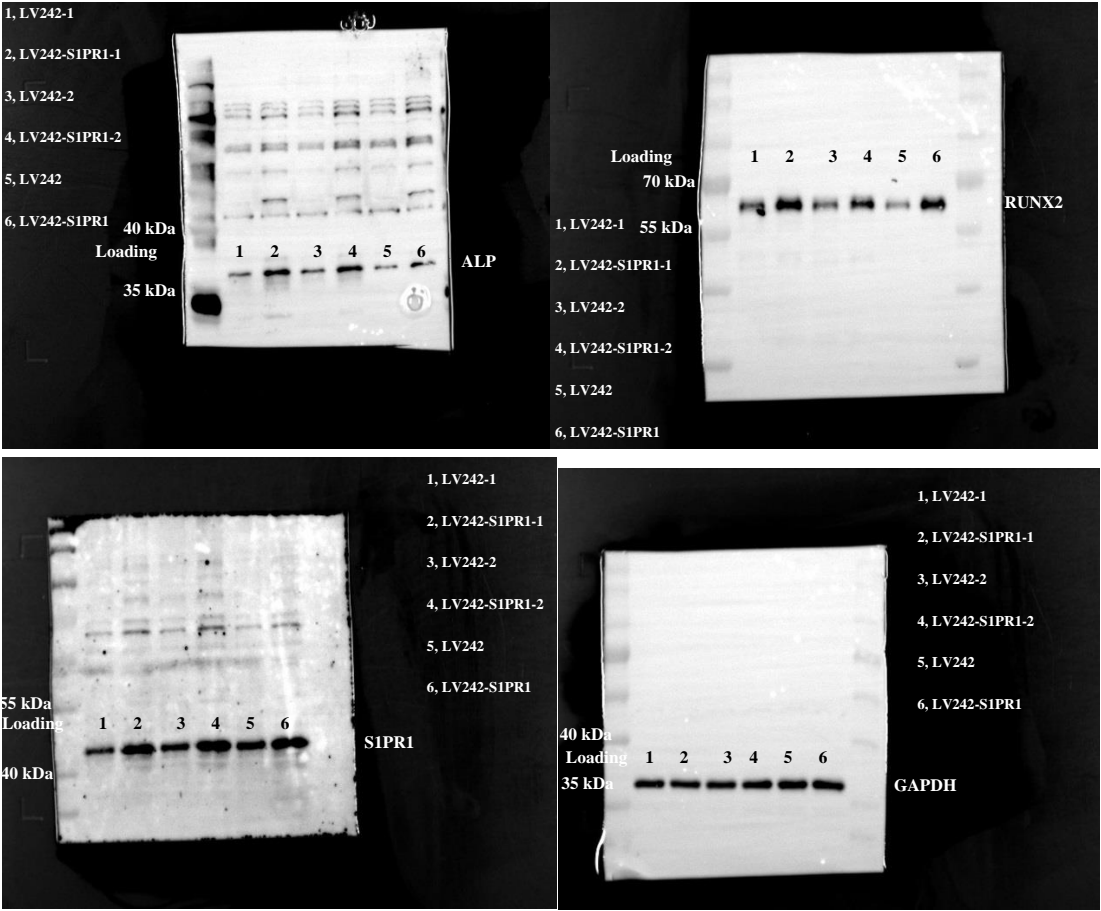

Supplement: fig8-data1 [file Original blots for Fig. 8D and Fig. 8G.pdf › Original blots for Fig. 8D and Fig. 8G.pdf]
